# Supplementary material for: RIP3 Translocation into Mitochondria Promotes Mitofilin Degradation to Increase Inflammation and Kidney Injury after Renal Ischemia–Reperfusion
Source: MDPI journal article supplement (doi:10.3390/cells11121894), 2022-06-11
Supplement: s1 [file s1]

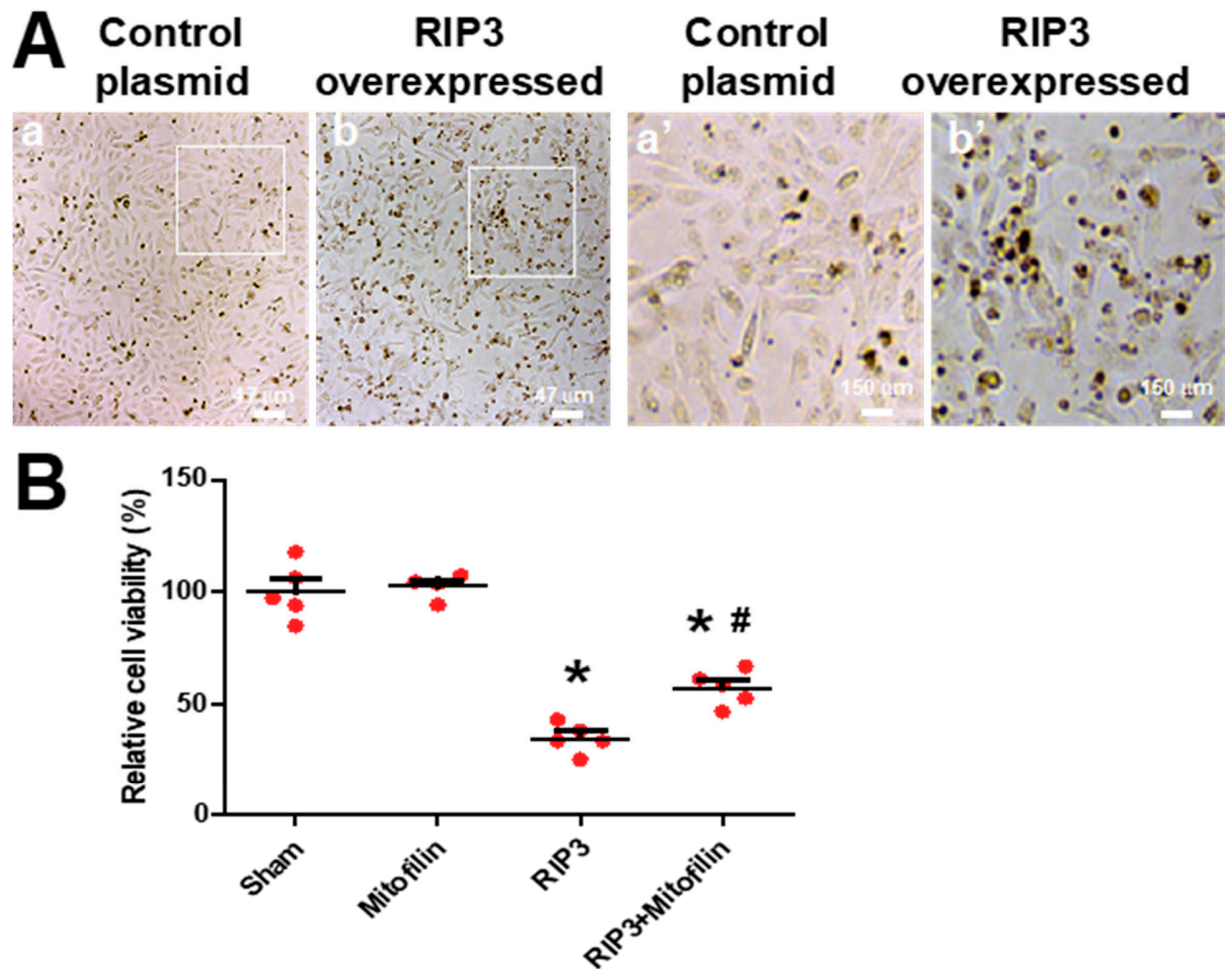

**Fig. S1, Feng et al.**

**Figure S1.** RIP3 overexpression in HK-2 cells increases cell death and reduces cell viability. (A) Image of HK-2 cells transfected with an RIP3-overexpressed plasmid and control vector (pCMV6), a' and b' are the regions magnified in a, and b, respectively. (B) Bar graph showing reductions in cell viability in RIP3-overexpressed, Mitofilin-overexpressed, and RIP3-overexpressed plus Mitofilin-overexpressed plasmids compared to the control (Ctrl) vector. The graph shows a significant reduction in cell viability in RIP3-overexpressed cells compared to the control plasmid. However, in cells co-transfected with both RIP3-overexpressed and Mitofilin-overexpressed plasmids, the level of cell viability was reduced when compared to cells transfected with RIP3-overexpressed vector alone. Note that there was no difference in the levels of cell viability in Mitofilin-overexpressed plasmid versus control plasmid. Values are expressed as means  $\pm$  SEM; \*  $P < 0.05$  versus control (Ctrl) vector group ( $n = 5$ /group).

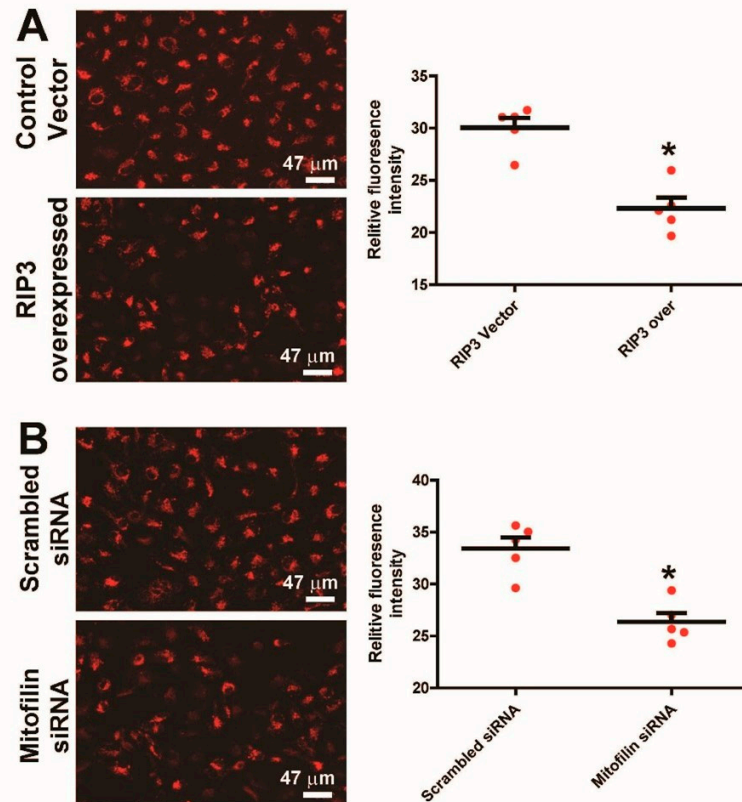

**Figure S2.** RIP3 overexpression or Mitofilin knockdown in HK-2 cells decreases mitochondrial membrane potential. **(A)** Left: Image of live HK-2 cells transfected with a control vector (pCMV6) or RIP3-overexpressed plasmid labeled with MitoTracker Red dye, respectively. Right: Bar graphs showing a reduction in mitochondrial membrane potential in cells transfected with RIP3-overexpressed plasmid compared to those transfected with control vector. Values are expressed as means  $\pm$ SEM; \*  $P < 0.05$  versus control vector group ( $n = 5/\text{group}$ ). **(B)** Left: Image of live HK-2 cells transfected with scrambled siRNA or with Mitofilin siRNA labeled with MitoTracker Red dye, respectively. Right: Bar graphs showing a reduction in mitochondrial membrane potential in cells transfected with Mitofilin siRNA compared to those transfected with scrambled siRNA. Values are expressed as means  $\pm$ SEM; \*  $P < 0.05$  versus scrambled siRNA group ( $n = 5/\text{group}$ ). Note that MitoTracker Red is a red fluorescent dye that stains mitochondria in live cells, and its accumulation is dependent upon membrane potential.
